# Supplementary material for: Atomically thin mesoporous NiCo2O4 grown on holey graphene for enhanced pseudocapacitive energy storage
Source: Royal Society of Chemistry journal article supplement (doi:10.1039/d0ta03007d), 2020-01-01
Supplement: d0ta03007d1.pdf [file d0ta03007d1.pdf]

## Supporting Information

### **Atomically Thin Mesoporous NiCo<sub>2</sub>O<sub>4</sub> Grown on Holey Graphene for Enhanced Pseudocapacitive Energy Storage**

*Ding Yuan,<sup>a</sup> Yuhai Dou,<sup>\*a</sup> Li Xu,<sup>b</sup> Linping Yu,<sup>c</sup> Ningyan Cheng,<sup>d</sup> Qingbing Xia,<sup>d</sup> Luke Hencz,<sup>a</sup> Jianmin Ma,<sup>ef</sup> Shi Xue Dou,<sup>d</sup> Shanqing Zhang<sup>\*a</sup>*

<sup>a</sup> Centre for Clean Environment and Energy, School of Environment and Science, Gold Coast Campus, Griffith University, QLD 4222, Australia

<sup>b</sup> Institute for Energy Research, School of Chemistry and Chemical Engineering, Key Laboratory of Zhenjiang, Jiangsu University, Zhenjiang 212013, China

<sup>c</sup> Hunan Provincial Key Laboratory of Materials Protection for Electric Power and Transportation, Changsha University of Science and Technology, Changsha 410114, China

<sup>d</sup> Institute for Superconducting and Electronic Materials, University of Wollongong Australia, Wollongong 2500, Australia

<sup>e</sup> School of Physics and Electronics, Hunan University, Changsha 410082, China

<sup>f</sup> National Engineering Research Center for Advanced Polymer Processing Technology, Zhengzhou University, Zhengzhou, 450002, China

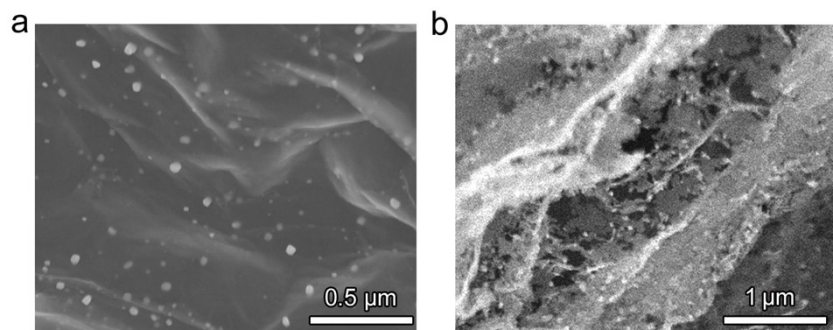

**Figure S1. SEM images of HG prepared under different calcination conditions. a) 800 °C for 1 h. b) 900 °C for 2 h.**

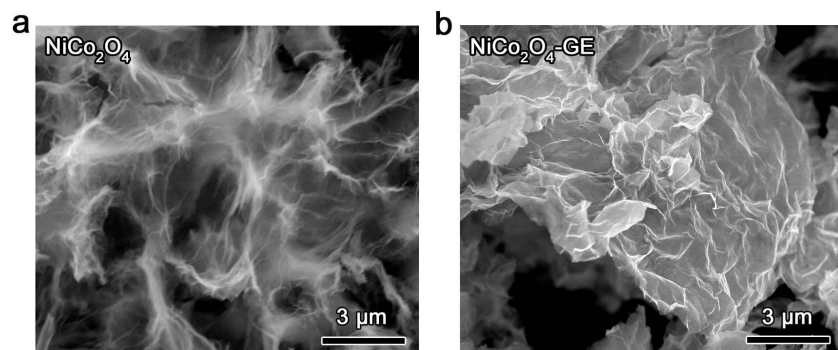

**Figure S2.** SEM images of atomically thin nanosheets. a)  $\text{NiCo}_2\text{O}_4$ . b)  $\text{NiCo}_2\text{O}_4\text{-GE}$ .

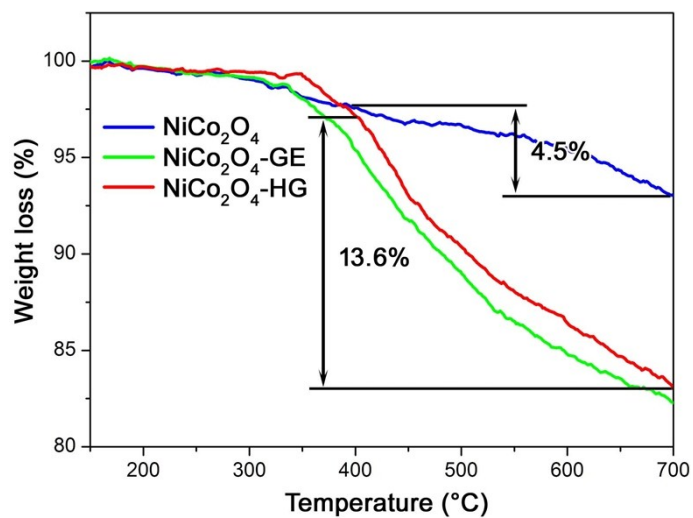

**Figure S3. TGA of  $\text{NiCo}_2\text{O}_4$ ,  $\text{NiCo}_2\text{O}_4\text{-GE}$  and  $\text{NiCo}_2\text{O}_4\text{-HG}$ .** The initial 1.2% weight loss before 300 °C is attributed to the evaporation of moisture and the decomposition of crystal water in the precursor. The 4.5% weight loss in  $\text{NiCo}_2\text{O}_4$  results from the carbonization of P123. As a result, the weight percentages of graphene in  $\text{NiCo}_2\text{O}_4\text{-GE}$  and  $\text{NiCo}_2\text{O}_4\text{-HG}$  are calculated as  $13.6\% - 4.5\% = 9.1\%$ .

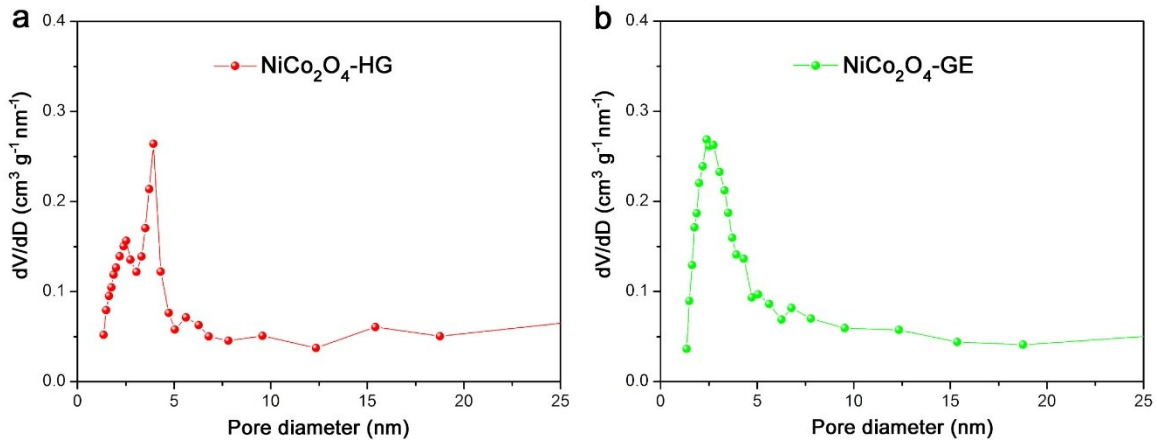

**Figure S4. Pore size distributions of  $\text{NiCo}_2\text{O}_4\text{-HG}$  and  $\text{NiCo}_2\text{O}_4\text{-GE}$ .**

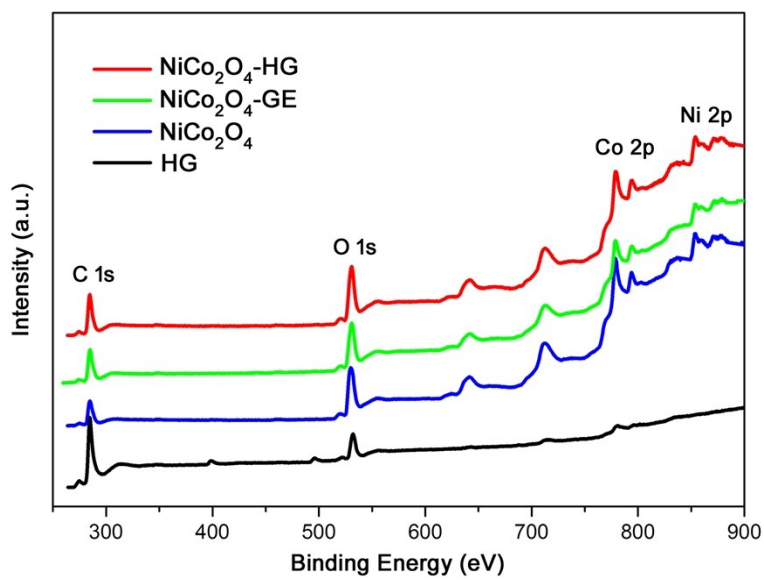

**Figure S5. XPS survey spectra of HG, NiCo<sub>2</sub>O<sub>4</sub>, NiCo<sub>2</sub>O<sub>4</sub>-GE and NiCo<sub>2</sub>O<sub>4</sub>-HG.**

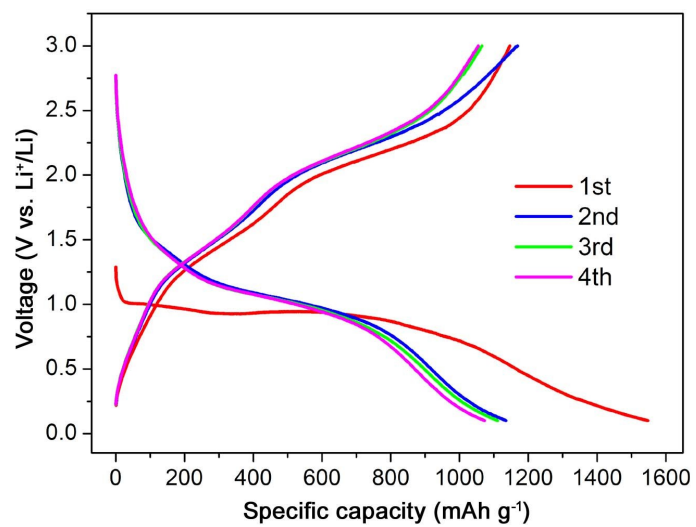

**Figure S6. Discharge-charge voltage profiles of NiCo<sub>2</sub>O<sub>4</sub>-HG at 0.2 C.**

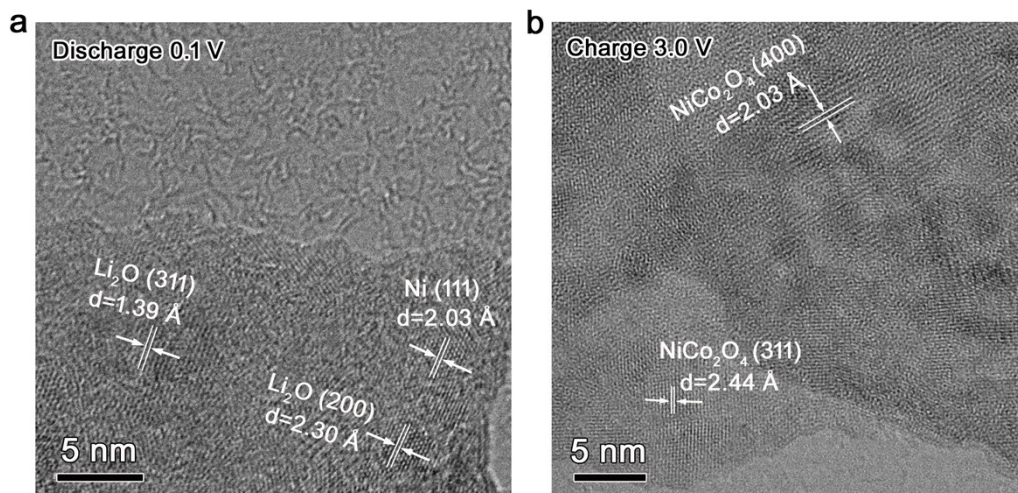

**Figure S7. HR-STEM images of  $\text{NiCo}_2\text{O}_4$ -HG electrodes.** a) Fully discharged state at 0.1 V. b) Fully charged state at 3.0 V.



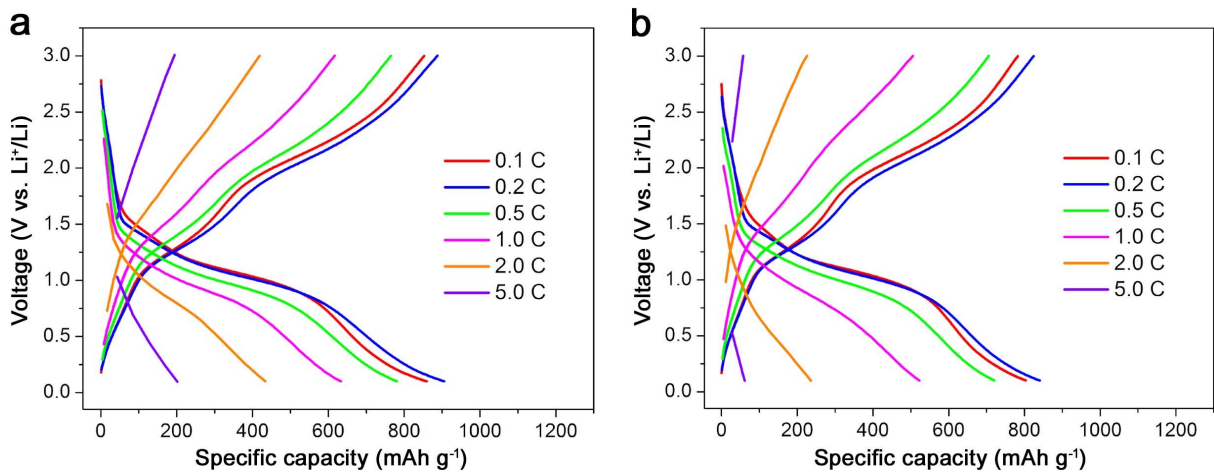

**Figure S8. Discharge–charge voltage profiles of NiCo<sub>2</sub>O<sub>4</sub>-HG at different C-rates. a) NiCo<sub>2</sub>O<sub>4</sub>-HG. b) NiCo<sub>2</sub>O<sub>4</sub>-GE.**

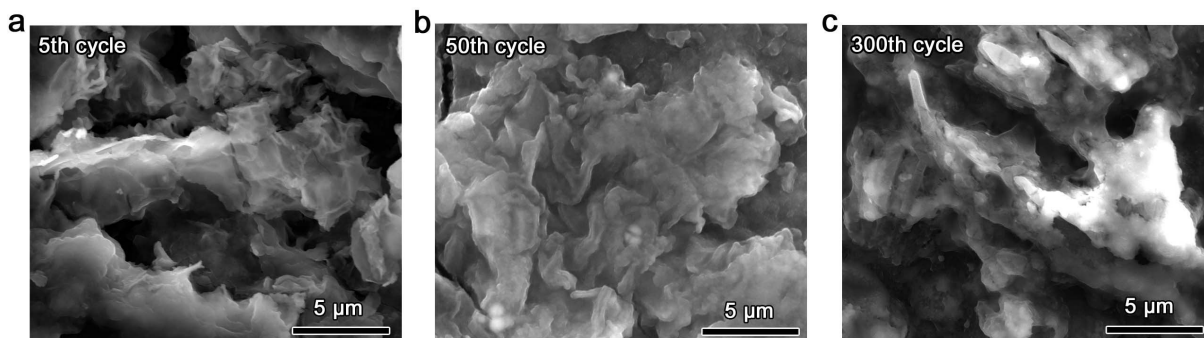

**Figure S9. SEM images of NiCo<sub>2</sub>O<sub>4</sub>-HG during Li<sup>+</sup> storage. a) after 5 cycles. b) after 50 cycles. c) after 300 cycles.**
